# Supplementary material for: Comparative Efficacy of Cabozantinib and Regorafenib for Advanced Hepatocellular Carcinoma
Source: PubMed Central journal article supplement — Adv Ther. 2020 May 18;37(6):2678–95. doi: 10.1007/s12325-020-01378-y (PMC7467441; doi:10.1007/s12325-020-01378-y), 2020-05-18
Supplement: 12325_2020_1378_MOESM1_ESM.pdf [file 12325_2020_1378_MOESM1_ESM.pdf]

# Comparative Efficacy of Cabozantinib and Regorafenib for Advanced Hepatocellular Carcinoma

Robin K. Kelley • Patrick Mollon • Jean-Frédéric Blanc • Bruno Daniele • Thomas Yau • Ann-Lii Cheng  
• Velichka Valcheva • Florence Marteau • Ines Guerra • Ghassan K. Abou-Alfa

R. K. Kelley (✉)

UCSF Helen Diller Family Comprehensive Cancer Center, San Francisco, CA, USA

Email: katie.kelley@ucsf.edu

P. Mollon • V. Valcheva • F. Marteau

Ipsen Pharma, Boulogne-Billancourt, France

J-F. Blanc

Hôpital Haut-Lévêque, CHU de Bordeaux, Bordeaux, France

B. Daniele

Azienda Ospedaliera G Rummo, Benevento, Italy

B. Daniele

Ospedale del Mare, Naples, Italy

T. Yau

University of Hong Kong, Hong Kong

A-L. Cheng

National Taiwan University Hospital and National Taiwan University Cancer Center, Taipei, Taiwan  
(Republic of China)

I. Guerra,

IQVIA Ltd, London, UK

G. K. Abou-Alfa

Memorial Sloan Kettering Cancer Center, New York, NY, USA

G. K. Abou-Alfa

Weill Medical College at Cornell University, New York, NY, USA

**Figure S1** Simplified decision tree summarizing the rationale for selecting the analysis approach used

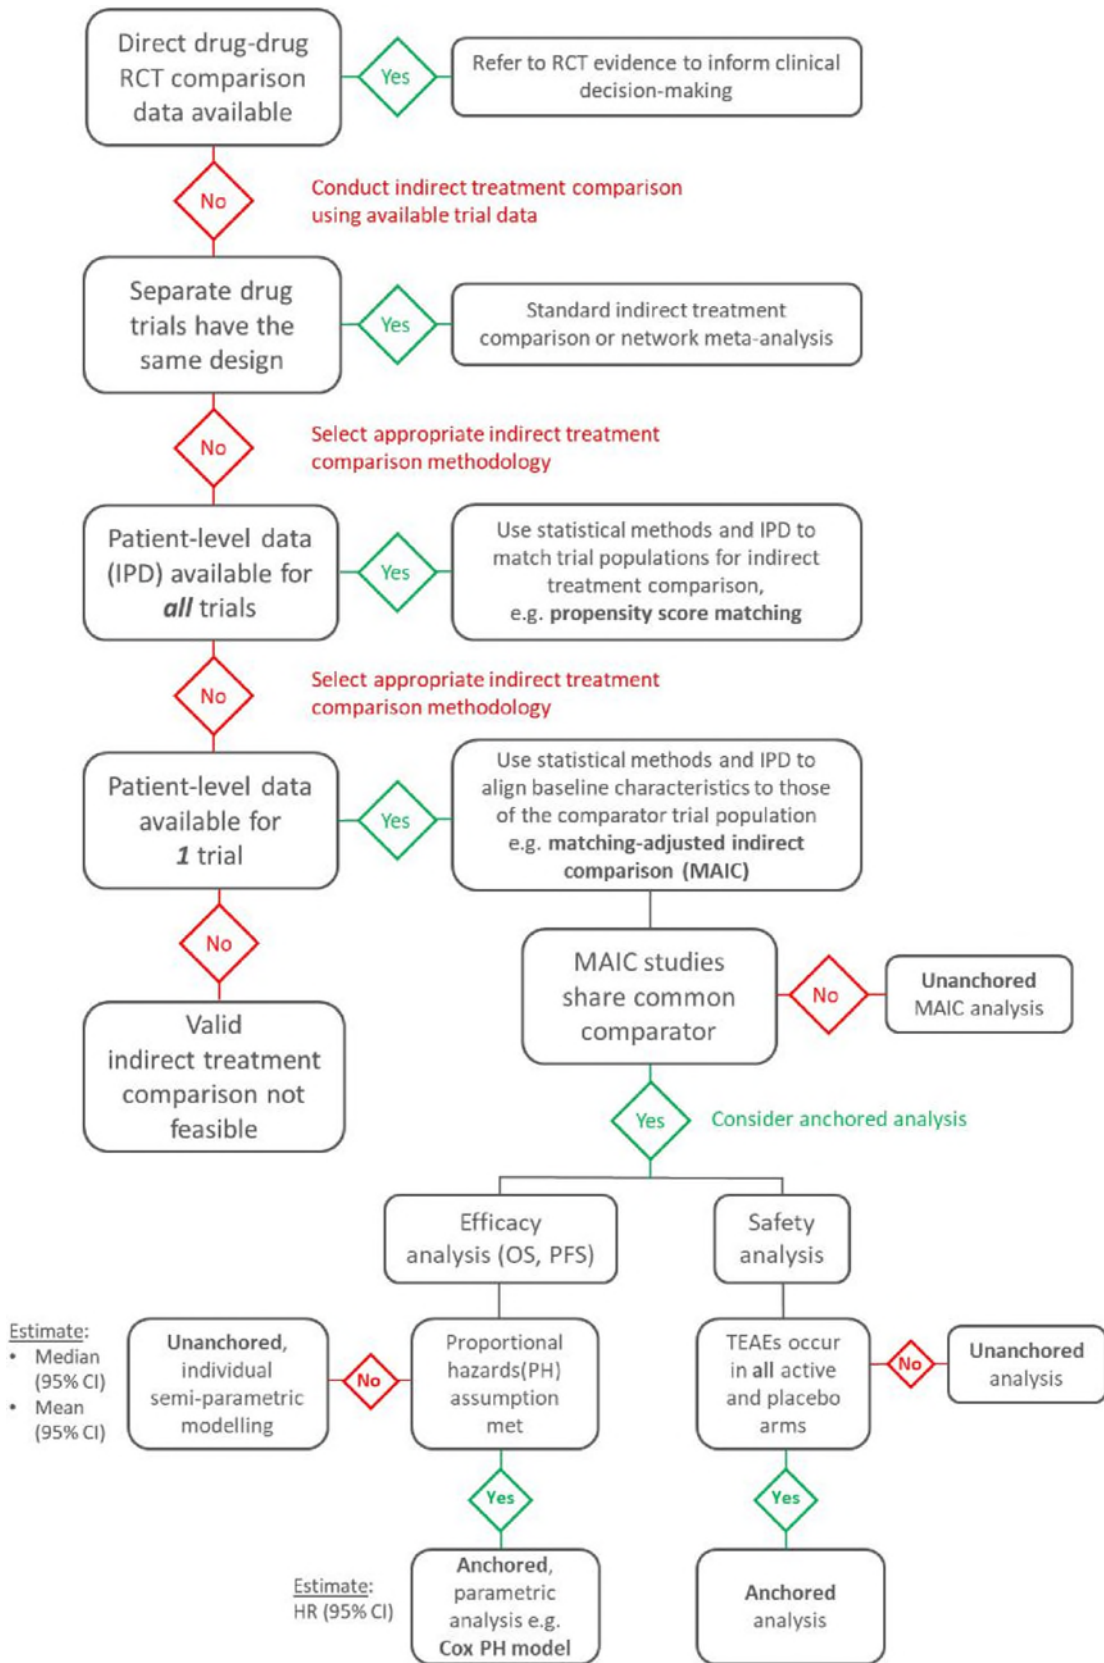

CI confidence interval, IPD individual patient data, HR hazard ratio, MAIC matching-adjusted indirect comparison, PH proportional hazards, RCT randomized controlled trial, TEAE treatment-emergent adverse events

Proportional hazards (PH) modeling is compatible with an anchored analysis and is preferable to an unanchored analysis, where valid. For an anchored analysis to be valid, the PH assumption must be justified. It is important to validate the PH assumption because parametric models (e.g. Cox Proportional Hazards) make stronger assumptions than semi-parametric alternatives. PH modeling applies a single hazard ratio to the entire modeling period, which requires the treatment effect to be proportional over time and for the survival curves fitted to each treatment group to be a similar shape. If this assumption cannot be justified, an unanchored approach is advised [1]. The PH assumption can be tested by visual inspection of the log-cumulative hazard plots for OS and PFS (to ensure that there is no pattern of non-parallelism) and by visual inspection of the scaled Schoenfeld residuals and the Grambsch–Therneau test based on the scaled Schoenfeld residuals (to ensure no systematic departure from the horizontal) [1, 2].

In the current analysis, differences between the CELESTIAL and RESORCE trials prevented use of a standard indirect treatment comparison. As individual patient data were only available to the investigators for the CELESTIAL trial population, a matching-adjusted indirect comparison approach was selected as a valid method of comparison. As the PH assumption was not satisfied for either survival outcome (OS or PFS), an unanchored analysis was conducted in accordance with NICE DSU TSD 14 guidelines, which state that if the PH assumption does not seem appropriate, it is most sensible to fit separate parametric models of the same type [1]. For the safety analysis, where TEAEs of interest occurred in all treatment arms, an anchored analysis was conducted; where this was not the case (i.e. for Palmar-plantar erythrodysesthesia and diarrhea), an unanchored analysis was carried out.

**Figure S2** Log-cumulative hazard plots for overall survival (a) and progression-free survival (b) for cabozantinib versus regorafenib in the matching-adjusted second-line CELESTIAL population and the RESORCE population

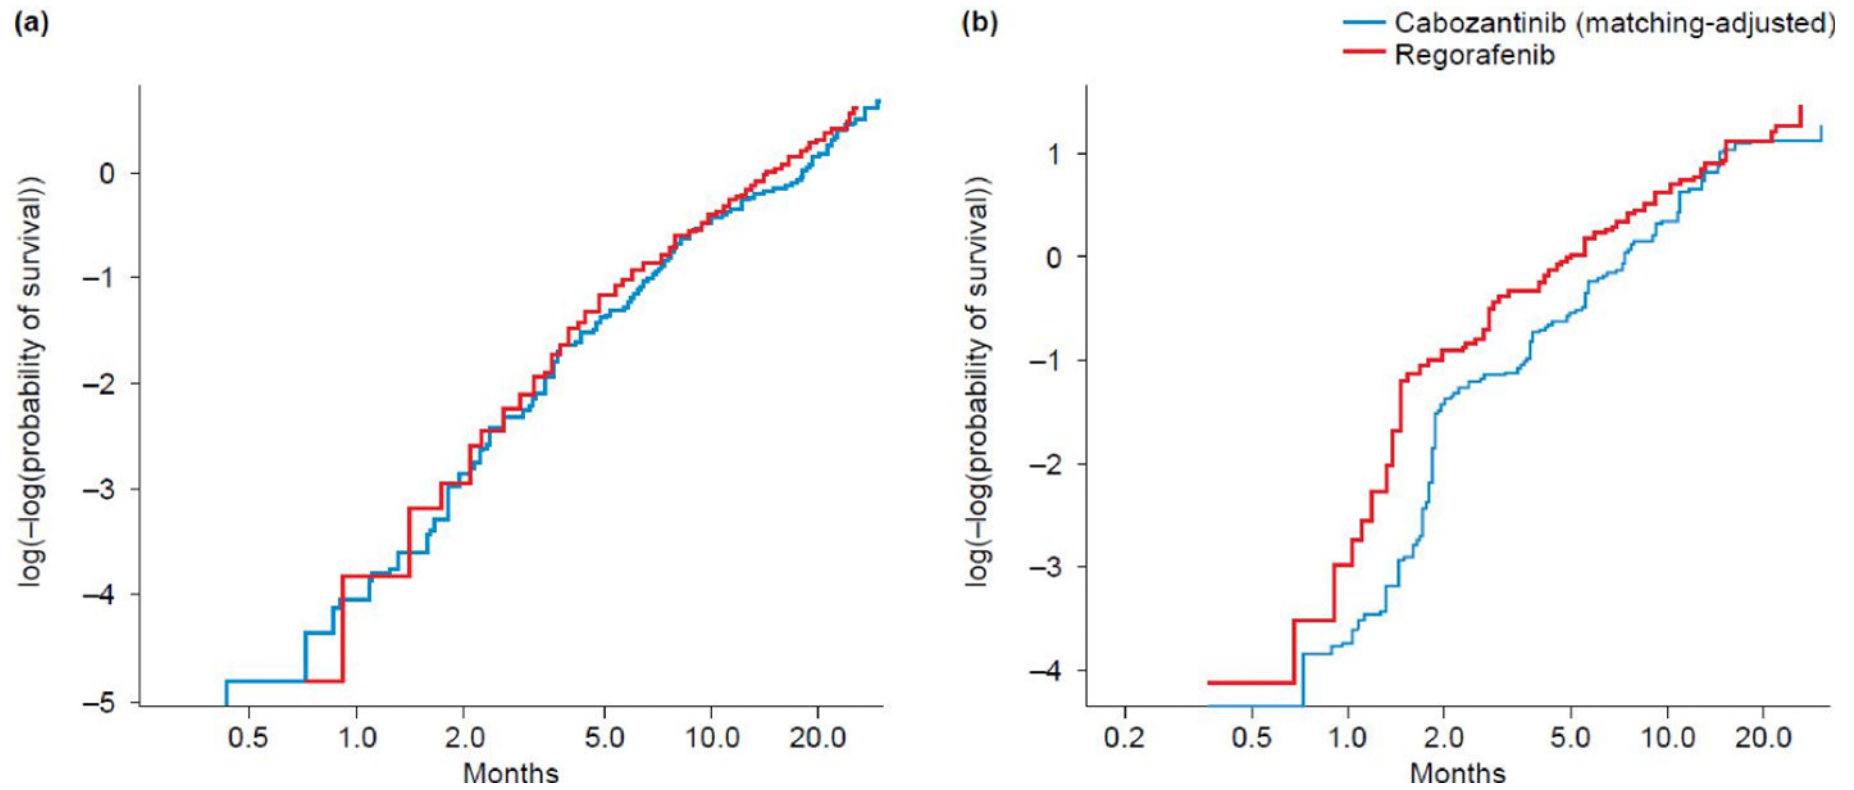

**Figure S3** Scaled Schoenfeld residuals for overall survival (a) and progression-free survival (b) for cabozantinib versus regorafenib in the matching-adjusted second-line CELESTIAL population and the RESORCE population

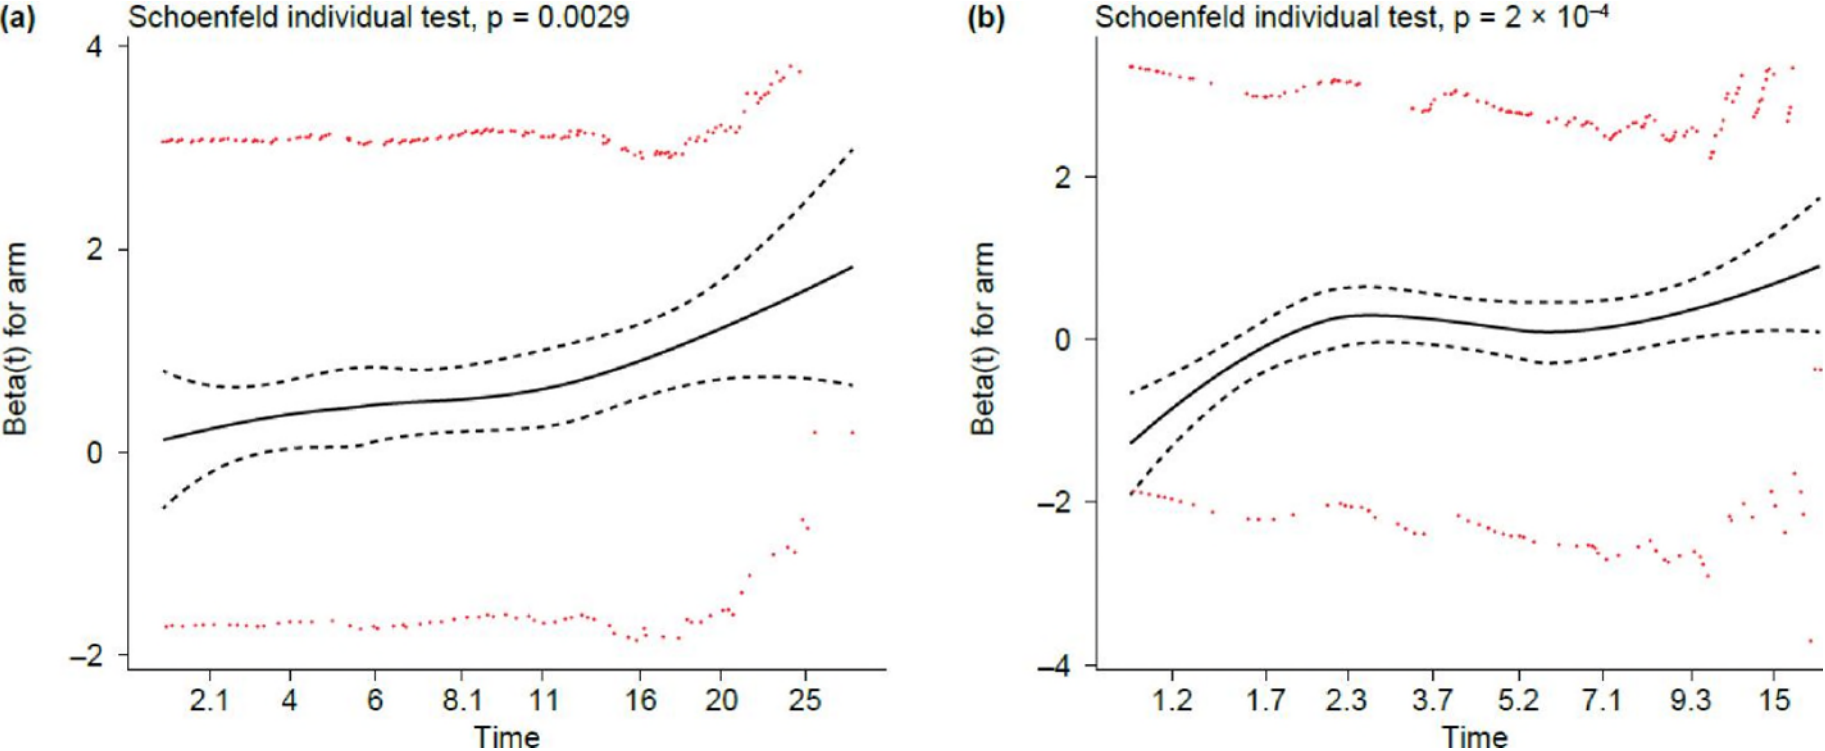

Smooth spline fit with dashed lines representing standard error and red dots representing outliers

**Table S1** Assessment of the design characteristics considered relevant for comparability[3, 4]

|                                                                              | CELESTIAL                                  | RESORCE                                   |
|------------------------------------------------------------------------------|--------------------------------------------|-------------------------------------------|
| Intervention                                                                 | Cabozantinib + BSC                         | Regorafenib + BSC                         |
| Study design                                                                 | Phase 3 placebo-controlled                 | Phase 3 placebo-controlled                |
| Randomization                                                                | 2:1 randomized to cabozantinib and placebo | 2:1 randomized to regorafenib and placebo |
| Blinding                                                                     | Double-blind                               | Double-blind                              |
| Posology                                                                     | Oral once daily                            | Oral once daily                           |
| Crossover                                                                    | Not allowed                                | NR                                        |
| Best supportive care                                                         | NR                                         | NR                                        |
| Main inclusion criteria                                                      |                                            |                                           |
| Histological or cytological diagnosis of HCC                                 | I                                          | I                                         |
| Subject has disease not amenable to curative treatment approach              | I                                          | NR                                        |
| Received prior sorafenib                                                     | I                                          | I                                         |
| Progression following: $\geq 1$ prior systemic HCC therapies                 | I                                          | I                                         |
| $\leq 2$ prior systemic therapies                                            | I                                          | X                                         |
| ECOG Performance Status score of 0 or 1                                      | I                                          | I                                         |
| Adequate hematologic and renal function                                      | I                                          | I                                         |
| Child–Pugh score of A                                                        | I                                          | I                                         |
| Antiviral therapy per local standard of care if active hepatitis B infection | I                                          | NR                                        |
| BCLC stage B or C                                                            | NR                                         | I                                         |
| Tolerability of prior treatment with sorafenib <sup>a</sup>                  | NR                                         | I                                         |
| Life expectancy of at least 3 months                                         | NR                                         | I                                         |

<sup>a</sup>RESORCE excluded sorafenib-intolerant patients; CELESTIAL did not exclude sorafenib-intolerant patients

BCLC Barcelona Clinic Liver Cancer, BSC best supportive care, HCC hepatocellular carcinoma, NR not recorded

**Table S2** Comparison of selected patient characteristics between CELESTIAL (overall population) and RESORCE (overall population) [3, 4]

|                                                     |                           | CELESTIAL (N = 707)       |                      | RESORCE (N = 573)        |                      |
|-----------------------------------------------------|---------------------------|---------------------------|----------------------|--------------------------|----------------------|
|                                                     |                           | Cabozantinib<br>(N = 470) | Placebo<br>(N = 237) | Regorafenib<br>(N = 379) | Placebo<br>(N = 194) |
| Median age, years                                   |                           | 64                        | 64                   | 64                       | 62                   |
| Female, %                                           |                           | 19                        | 15                   | 12                       | 12                   |
| Race, %                                             | Asian                     | 34                        | 35                   | 41                       | 40                   |
|                                                     | Black or African American | 2                         | 5                    | 2                        | 1                    |
|                                                     | White                     | 56                        | 55                   | 36                       | 35                   |
|                                                     | Other/NR                  | 7                         | 5                    | 21                       | 24                   |
| Region, %                                           | Asia                      | 25                        | 25                   | 38                       | 38                   |
|                                                     | Rest of world             | 75                        | 75                   | 62                       | 62                   |
| ECOG Performance Status, %                          | 0                         | 52                        | 55                   | 65                       | 67                   |
|                                                     | 1                         | 48                        | 45                   | 35                       | 33                   |
| BCLC state on entry, %                              | A (early)                 | NR                        | NR                   | 0.3                      | 0                    |
|                                                     | B (intermediate)          | NR                        | NR                   | 14                       | 11                   |
|                                                     | C (advanced)              | NR                        | NR                   | 86                       | 89                   |
| Child–Pugh score at entry, %                        | A                         | 98                        | 99                   | 98                       | 97                   |
|                                                     | B                         | 1                         | 0.8                  | 1                        | 3                    |
| Prior treatment, %                                  | 1 systemic therapy        | 71                        | 73                   | 100                      | 100                  |
|                                                     | 2 systemic therapies      | 28                        | 26                   | 0                        | 0                    |
| Duration of prior sorafenib, median (IQR) (months)  |                           | 5.32<br>(0.3, 70.0)       | 4.80<br>(0.2, 76.8)  | 7.8<br>(4.2, 14.5)       | 7.8<br>(4.4, 14.7)   |
| Baseline HCC disease per CRF, % extrahepatic spread |                           | 79                        | 77                   | 70                       | 76                   |
| Etiology of disease, %                              | HBV (without known HCV)   | 36                        | 36                   | NR                       | NR                   |
|                                                     | HCV (without known HBV)   | 22                        | 22                   | NR                       | NR                   |
|                                                     | HBV and HCV               | 2                         | 2                    | NR                       | NR                   |
|                                                     | HBV ± known HCV           | 38                        | 38                   | 38                       | 38                   |
|                                                     | HCV ± known HBV           | 24                        | 23                   | 21                       | 21                   |
| Alpha fetoprotein, %                                | < 400 ng/mL               | 59                        | 57                   | 57                       | 55                   |
|                                                     | ≥ 400 ng/mL               | 41                        | 43                   | 43                       | 45                   |

Clear differences in the baseline characteristics of the overall population of CELESTIAL and the overall population of RESORCE can be seen for race, region, ECOG Performance Status, number of prior treatments, and duration of prior sorafenib treatment between the trials

*BCLC* Barcelona Clinic Liver Cancer, *CRF* case report form, *ECOG* Eastern Cooperative Oncology Group, *HBV* hepatitis B virus, *HCC* hepatocellular carcinoma, *HCV* hepatitis C virus, *IQR* interquartile range, *NR* not reported

**Table S3** AIC and BIC values for the candidate models fitted to the overall survival data

|                   | Unmatched second-line cabozantinib |         | Matching-adjusted second-line cabozantinib |         | Regorafenib |         |
|-------------------|------------------------------------|---------|--------------------------------------------|---------|-------------|---------|
|                   | AIC                                | BIC     | AIC                                        | BIC     | AIC         | BIC     |
| Exponential       | 1647.81                            | 1651.60 | 1678.56                                    | 1682.34 | 1740.62     | 1744.56 |
| Weibull           | 1635.25                            | 1642.82 | 1672.09                                    | 1679.67 | 1727.96     | 1735.84 |
| Gompertz          | 1643.49                            | 1651.06 | 1678.39                                    | 1685.96 | 1739.24     | 1747.11 |
| Log-logistic      | 1636.40                            | 1643.98 | 1668.20                                    | 1675.78 | 1716.81     | 1724.68 |
| Log-normal        | 1646.09                            | 1653.66 | 1675.18                                    | 1682.75 | 1712.17     | 1720.05 |
| Generalized gamma | 1634.37                            | 1645.73 | 1668.37                                    | 1679.74 | 1714.10     | 1725.92 |

The model with the lowest AIC and BIC for regorafenib is the log-normal. However, the log-normal performs relatively poorly against the cabozantinib data (e.g. it gives the highest BIC for weighted cabozantinib in Scenario 2). The Weibull model fits the cabozantinib data well (e.g. it gives the lowest AIC; however, its fit to the regorafenib data is mediocre (fourth lowest AIC and BIC values). Both the log-logistic and generalized gamma models give good fits (always within the three lowest AIC/BIC values) for both treatments. The log-logistic distribution is selected to model the OS outcome as it appears to fit the weighted cabozantinib data better upon visual assessment.

*AIC* Akaike's Information Criterion, *BIC* Schwarz's Bayesian Information Criterion

|  | Unmatched second-line cabozantinib |     | Matching-adjusted second-line cabozantinib |     | Regorafenib |     |
|--|------------------------------------|-----|--------------------------------------------|-----|-------------|-----|
|  | AIC                                | BIC | AIC                                        | BIC | AIC         | BIC |

**Table S4** AIC and BIC values for the candidate models fitted to the progression-free survival data

|                   |         |         |         |         |         |         |
|-------------------|---------|---------|---------|---------|---------|---------|
| Exponential       | 1439.30 | 1443.09 | 1480.30 | 1484.09 | 1641.66 | 1645.60 |
| Weibull           | 1419.50 | 1427.08 | 1457.16 | 1464.73 | 1634.92 | 1642.79 |
| Gompertz          | 1436.25 | 1443.82 | 1476.18 | 1483.75 | 1643.38 | 1651.26 |
| Log-logistic      | 1412.23 | 1419.80 | 1453.83 | 1461.41 | 1590.28 | 1598.15 |
| Log-normal        | 1417.85 | 1425.43 | 1467.01 | 1474.58 | 1577.40 | 1585.27 |
| Generalized gamma | 1410.04 | 1421.40 | 1450.61 | 1461.97 | 1575.13 | 1586.94 |

The model with the lowest AIC for regorafenib is the generalized gamma and that with the lowest BIC is the log-normal. For cabozantinib, the model with the lowest AIC is the generalized gamma and that with the lowest BIC is the log-logistic. The generalized gamma also gives low BIC values (the second lowest BIC). Hence, the generalized gamma is selected as the winning model for the PFS outcome.

*AIC* Akaike's Information Criterion, *BIC* Schwarz's Bayesian Information Criterion





**Table S5** Median survival estimates for the CELESTIAL and RESORCE populations: extrapolated 5-year parametric models for active treatment (a) and placebo (b) arms

| (a) Survival estimate <sup>a</sup> | CELESTIAL population |                                              |                                                        | RESORCE               |
|------------------------------------|----------------------|----------------------------------------------|--------------------------------------------------------|-----------------------|
|                                    | Overall (N = 470)    | Unmatched second-line cabozantinib (N = 331) | Matching-adjusted second-line cabozantinib (ESS = 187) | Regorafenib (N = 379) |
| OS, mean (95% CI) months           | 20.41 (17.22–24.90)  | 22.35 (18.12–28.72)                          | 24.65 (19.57–32.79)                                    | 21.17 (17.12–27.42)   |
| OS, median (95% CI) months         | 10.46 (9.46–11.58)   | 11.27 (9.96–12.73)                           | 11.40 (10.01–12.96)                                    | 10.29 (9.15–11.56)    |
| PFS, mean (95% CI) months          | 6.45 (5.87–7.18)     | 6.98 (6.24–7.92)                             | 7.17 (6.46–8.03)                                       | 6.04 (5.09–8.33)      |
| PFS, median (95% CI) months        | 4.73 (4.32–5.19)     | 5.17 (4.62–5.79)                             | 5.49 (4.92–6.13)                                       | 3.39 (3.05–3.78)      |

<sup>a</sup>log-logistic and generalized gamma models selected to fit the full cabozantinib OS and PFS data, respectively  
*CI* confidence interval, *ESS* effective sample size, *OS* overall survival, *PFS* progression-free survival

| (b) Survival estimate <sup>a</sup> | second-line CELESTIAL placebo arm (ESS = 81) | Matching-adjusted RESORCE placebo arm (N = 194) |
|------------------------------------|----------------------------------------------|-------------------------------------------------|
| OS, median (95% CI) months         | 8.27 (7.00–9.76)                             | 7.30 (6.30–8.47)                                |
| PFS, median (95% CI) months        | 2.35 (2.11–2.61)                             | 1.87 (1.68–2.09)                                |

<sup>a</sup>log-logistic and generalized gamma models selected to fit the CELESTIAL placebo OS and PFS data, respectively  
*CI* confidence interval, *ESS* effective sample size, *OS* overall survival, *PFS* progression-free survival

**Table S6** Log-ORs for selected grade 3 or 4 treatment-emergent adverse events in the CELESTIAL trial (matching-adjusted and unmatched, second-line population) compared with the RESORCE trial population

| TEAE                              | Second-line CELESTIAL population | Log-OR | 95% CI      | Standard error | p value              |
|-----------------------------------|----------------------------------|--------|-------------|----------------|----------------------|
| Anchored analysis                 |                                  |        |             |                |                      |
| Increased AST                     | Unmatched                        | 0.89   | −0.31, 2.09 | 0.61           | 0.1478               |
|                                   | Matching-adjusted                | 0.79   | −0.47, 2.06 | 0.65           | 0.2201               |
| Diarrhea                          | Unmatched                        | NA     | NA          | NA             | NA                   |
|                                   | Matching-adjusted                | NA     | NA          | NA             | NA                   |
| Elevated bilirubin                | Unmatched                        | −0.55  | −3.01, 1.91 | 1.25           | 0.6732               |
|                                   | Matching-adjusted                | −0.25  | −2.73, 2.23 | 1.26           | 0.8558               |
| Fatigue                           | Unmatched                        | 0.07   | −1.65, 1.79 | 0.88           | 0.9404               |
|                                   | Matching-adjusted                | 0.09   | −1.77, 1.94 | 0.95           | 0.9313               |
| Hypertension                      | Unmatched                        | 1.73   | −0.45, 3.91 | 1.11           | 0.1207               |
|                                   | Matching-adjusted                | 2.1    | −0.1, 4.3   | 1.12           | 0.0611               |
| Unanchored analysis               |                                  |        |             |                |                      |
| Diarrhea                          | Unmatched                        | 1.55   | 0.8, 2.3    | 0.38           | 1 × 10 <sup>−4</sup> |
|                                   | Matching-adjusted                | 1.74   | 1, 2.48     | 0.38           | 0.001                |
| Palmar-plantar erythrodysesthesia | Unmatched                        | 0.3    | −0.17, 0.77 | 0.24           | 0.2103               |
|                                   | Matching-adjusted                | 0.05   | −0.4, 0.5   | 0.23           | 0.848                |

AST aspartate aminotransferase, CI confidence interval, NA not applicable, OR odds ratio, TEAE treatment-emergent adverse event

## References

1. Latimer N. NICE DSU technical support document 14: survival analysis for economic evaluations alongside clinical trials-extrapolation with patient-level data: 2011 <http://nicedsu.org.uk/wp-content/uploads/2016/03/NICE-DSU-TSD-Survival-analysis.updated-March-2013.v2.pdf>. Accessed 29 January 2020.
2. Xue Y, Schifano ED. Diagnostics for the Cox model. CSAM. 2017;24(6):583-604. doi:10.29220/CSAM.2017.24.6.583.
3. Abou-Alfa GK, Meyer T, Cheng A-L, El-Khoueiry AB, Rimassa L, Ryoo B-Y, et al. Cabozantinib in patients with advanced and progressing hepatocellular carcinoma. N Engl J Med. 2018;379(1):54-63. doi:10.1056/NEJMoa1717002.
4. Bruix J, Qin S, Merle P, Granito A, Huang Y-H, Bodoky G, et al. Regorafenib for patients with hepatocellular carcinoma who progressed on sorafenib treatment (RESORCE): a randomised, double-blind, placebo-controlled, phase 3 trial. Lancet. 2017;389(10064):56-66. doi:10.1016/S0140-6736(16)32453-9.
